# Supplementary figures and images for: Silver nanoparticles on carboxyl-functionalized Fe3O4 with high catalytic activity for 4-nitrophenol reduction
Source: Royal Society of Chemistry journal article supplement (doi:10.1039/c5ra04647e), 2015-01-01

### Supplementary Information

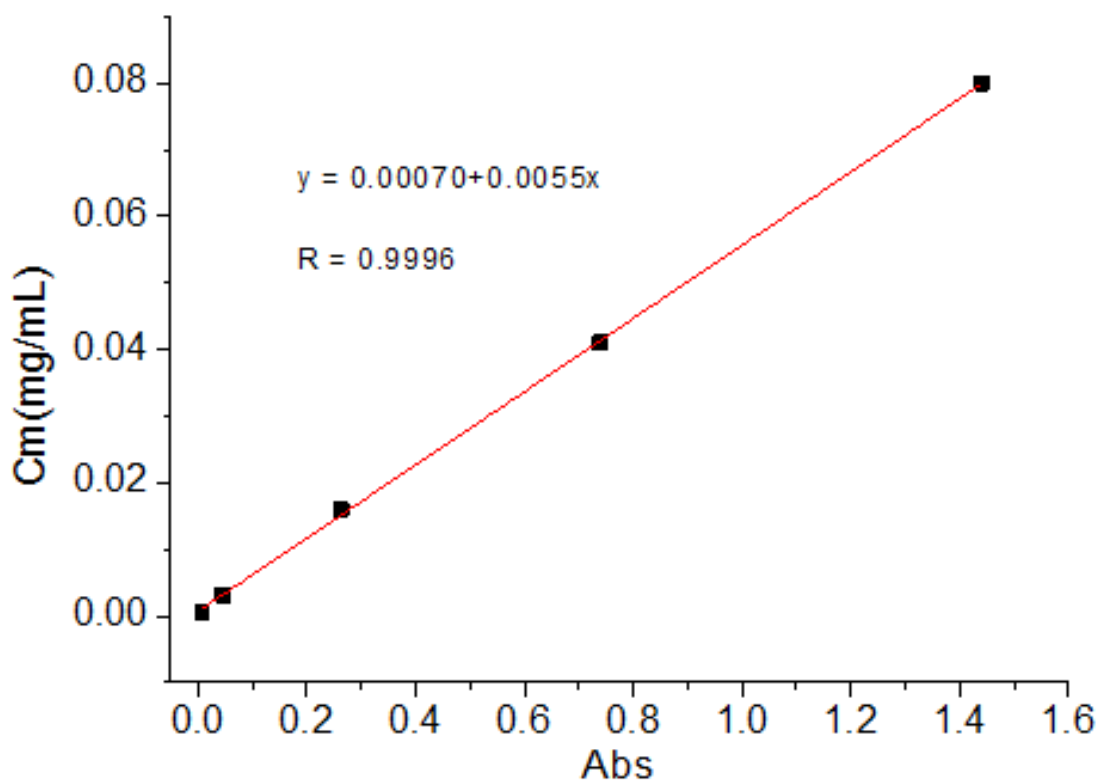

S1. Standard curve of 4-AP in water solution

Supplement: c5ra04647e1.pdf [file c5ra04647e1.pdf]
